# Supplementary material for: Dark Sweet Cherry (Prunus avium) Supplementation Reduced Blood Pressure and Pro-Inflammatory Interferon Gamma (IFNγ) in Obese Adults without Affecting Lipid Profile, Glucose Levels and Liver Enzymes
Source: MDPI journal article supplement (doi:10.3390/nu15030681), 2023-01-29
Supplement: s1 [file s1]

**Supplementary Table S1.** Nutritional and physicochemical characteristics of DSC concentrated juice, DSC powder, and reconstituted DSC drink

| <b>DSC concentrated juice</b>                                         |                            |                                                        |
|-----------------------------------------------------------------------|----------------------------|--------------------------------------------------------|
|                                                                       | <b>Range</b>               | <b>Method</b>                                          |
| <b>°Brix<sup>a</sup></b>                                              | 68.0° ± 1.0°               | AOAC 932.13                                            |
| <b>Titrateable Acidity (wt/wt as malic)<sup>a</sup></b>               | 1.5 – 3.2                  | AOAC 942.15                                            |
| <b>pH @ 20.0 Brix<sup>a</sup></b>                                     | 3.2 – 4.2                  | pH Meter                                               |
| <b>Color @ 520nm as absorbance<sup>a</sup></b>                        | 7.0 Minimum                | Spectrophotometer                                      |
| <b>Color ratio (Color @520nm / 430nm)<sup>a</sup></b>                 | 1.5 Minimum                | Spectrophotometer                                      |
| <b>Turbidity (NTU @ 20.0 Brix)<sup>a</sup></b>                        | <100                       | Turbidimeter                                           |
| <b>Total phenolics</b> (mg gallic acid equivalent (GAE)/mL)           | 7.64 ± 1.67                | Folin-Ciocalteu colorimetric micro-method <sup>1</sup> |
| <b>Anthocyanins</b> (mg cyanidin 3-glucoside equivalent (C3G Eq.)/mL) | 1.39 ± 0.26                | HPLC-MS/MS <sup>2</sup>                                |
| <b>DSC powder</b>                                                     |                            |                                                        |
| <b>Color<sup>b</sup></b>                                              | Light to dark burgundy     | Sensory                                                |
| <b>Odor<sup>b</sup></b>                                               | Mild cherry, no off notes  | Sensory                                                |
| <b>Flavor<sup>b</sup></b>                                             | Clean cherry, no off notes | Sensory                                                |
| <b>Total Plate Count<sup>b</sup></b>                                  | < 1,000 cfu/g              | AOAC                                                   |
| <b>Yeast &amp; Mold<sup>b</sup></b>                                   | < 10 cfu/g                 | FDA BAM                                                |
| <b>Coliforms<sup>b</sup></b>                                          | < 3 cfu/g                  | AOAC                                                   |
| <b>L monocytogenes<sup>b</sup></b>                                    | None detected              | AOAC                                                   |
| <b>Salmonella<sup>b</sup></b>                                         | None detected              | AOAC                                                   |
| <b>Ash<sup>c</sup></b>                                                | 21.39%                     | AOAC 923.03                                            |
| <b>Calories<sup>c</sup></b>                                           | 303 calories/100g          | 21 CFR Part 101                                        |
| <b>Total carbohydrates<sup>c</sup></b>                                | 68.54 %                    | 21 CFR Part 101                                        |
| <b>Fat<sup>c</sup></b>                                                | 1.02%                      | AACC 30-10/AOAC 922.06                                 |
| <b>Moisture<sup>c</sup></b>                                           | 4.26%                      | AOAC 925.10                                            |
| <b>Protein<sup>c</sup></b>                                            | 4.79%                      | Kjeldahl method                                        |
| <b>Total Dietary Fibers<sup>c</sup></b>                               | 3.74%                      | AOAC 991.43/AACC 32.07                                 |
| <b>Total phenolics</b> (mg gallic acid equivalent (GAE)/g)            | 3.05 ± 0.07                | Folin-Ciocalteu colorimetric micro-method <sup>1</sup> |
| <b>Anthocyanins</b> (mg C3G Eq./g)                                    | 0.24 ± 0.04                | pH-differential spectrophotometric method <sup>3</sup> |
| <b>Reconstituted DSC drink (200 mL)<sup>d</sup></b>                   |                            |                                                        |
| <b>°Brix</b>                                                          | 18.05 ± 1.04               |                                                        |
| <b>pH</b>                                                             | 3.88 ± 0.04                |                                                        |
| <b>Titrateable Acidity</b> (% , as malic acid)                        | 2.54 ± 0.10                |                                                        |
| <b>Energy</b> (kCal)                                                  | ~146                       |                                                        |
| <b>Dietary fiber</b> (g)                                              | 0.11                       |                                                        |
| <b>Phenolic acids</b> (mg gallic acid equivalent)                     | 439.6 ± 6.6                |                                                        |
| <b>Anthocyanins</b> (mg C3G)                                          | 70.21 ± 0.12               |                                                        |

<sup>a</sup> Data provided by *FruitSmart* in datasheet product specification. <sup>b</sup> Data provided by Anderson Advanced Ingredients in datasheet product specification. <sup>c</sup> Cherry powder analysis report provided by Analytical Food

Laboratories (AFL) (Grand Prairie, TX, USA). <sup>d</sup> The reconstituted DSC drink contained 50 mL DSC concentrated juice, 3g DSC powder and 150 mL water. Data are presented as mean  $\pm$  SEM.

**Supplementary Table S2.** Formulation of placebo concentrated juice and nutritional and physicochemical characteristics of placebo concentrated drink

| <b>Placebo concentrated drink formula <sup>a</sup></b>   |                  |
|----------------------------------------------------------|------------------|
| <b>Ingredient</b>                                        | <b>g/L</b>       |
| Maltodextrin                                             | 516.67           |
| Fructose                                                 | 116.67           |
| Sugar                                                    | 79.07            |
| Citric acid                                              | 1.00             |
| Natural cherry flavor                                    | 2.00             |
| Cherry syrup                                             | 36.00            |
| Red 40                                                   | 5.00             |
| Blue color                                               | 2.00             |
| <b>Reconstituted placebo drink (200 mL) <sup>b</sup></b> |                  |
| pH                                                       | 3.52 $\pm$ 0.06  |
| Brix                                                     | 18.11 $\pm$ 1.17 |
| Titratable acidity (% , as malic acid)                   | 0.12 $\pm$ 0.03  |
| Energy (Kcal)                                            | ~142             |
| Dietary fiber (g)                                        | -                |
| Protein (g)                                              | -                |
| Fat (g)                                                  | -                |
| Phenolic acids (mg gallic acid equivalent)               | -                |
| Anthocyanins (mg C3G)                                    | -                |

<sup>a</sup> Maltodextrin (Maltrin M180; Muscatine, IA), fructose (ADM; Decatur, IL), granulated sugar (“Great Value”; Bentonville, AZ), citric acid (“Milliard”; Lakewood, NJ) natural cherry flavor (“Bell”, Northbrook. IL), cherry syrup (“Torani,” San Leandro, CA), Red 40 and Blue 1 (“McCormick”, Hunt Valley, MD) <sup>b</sup> Data are presented as mean  $\pm$  SEM

**Supplementary Table S3.** Demographic characteristics of study participants.

| <b>Characteristics</b>        | <b>Cherry (<i>n</i> = 19)</b> | <b>Placebo (<i>n</i> = 21)</b> |
|-------------------------------|-------------------------------|--------------------------------|
| <b>Gender</b>                 |                               |                                |
| Female                        | 11                            | 14                             |
| Male                          | 8                             | 7                              |
| <b>Race</b>                   |                               |                                |
| White                         | 11                            | 15                             |
| Black/African American        | 4                             | 3                              |
| Asian                         | 3                             | 2                              |
| American Indian/Alaska Native | 1                             | 1                              |
| <b>Ethnicity</b>              |                               |                                |
| Hispanic                      | 3                             | 2                              |
| Not Hispanic                  | 16                            | 19                             |
| <b>Income</b>                 |                               |                                |
| Less than \$10,000            | 2                             | 2                              |
| 10,000-24,999                 | 4                             | 0                              |
| 25,000-49,999                 | 5                             | 3                              |
| 50,000-74,999                 | 1                             | 5                              |
| 75,000-99,999                 | 0                             | 4                              |
| 100,000-150,000               | 3                             | 2                              |
| 150,000 and greater           | 1                             | 1                              |
| Prefer not to answer          | 3                             | 3                              |
| <b>Job Category</b>           | <b>(<i>n</i> = 7)</b>         | <b>(<i>n</i> = 11)</b>         |
| Student                       | 3                             | 1                              |
| Employed                      | 3                             | 8                              |
| Housewife                     | 1                             | 0                              |
| Self-employed                 | 0                             | 1                              |
| Retired                       | 0                             | 1                              |
| <b>Marital status</b>         | <b>(<i>n</i> = 7)</b>         | <b>(<i>n</i> = 10)</b>         |
| Single                        | 2                             | 3                              |
| Married                       | 3                             | 5                              |
| Divorced                      | 2                             | 1                              |
| Widow                         | 0                             | 1                              |

**Supplementary Table S4.** Nutritional patterns and HEI scores in cherry and placebo groups

| <b>Parameter</b>   | <b>Cherry (<i>n</i> = 19)</b> | <b>Placebo (<i>n</i> = 21)</b> | <b>p-value</b> |
|--------------------|-------------------------------|--------------------------------|----------------|
| Energy (Kcal/day)  | 1911 (1599, 2224)             | 2025 (1780, 2269)              | 0.54           |
| Carbohydrate (gr.) | 212.1 (177.4, 246.7)          | 214.5 (184.9, 244.1)           | 0.74           |
| Fat (gr.)          | 78.9 (57.5, 100.3)            | 81.2 (67.5, 94.8)              | 0.77           |
| Protein (gr.)      | 77.2 (62.9, 91.4)             | 86.2 (71.1, 101.2)             | 0.34           |
| Fiber (gr.)        | 12.8 (11.0, 14.5)             | 16.4 (12.5, 20.2)              | 0.16           |
| Cholesterol (mg.)  | 284.7 (210.4, 359.1)          | 259.7 (188.7, 330.7)           | 0.52           |
| HEI Score          | 40.7 (36.7, 44.7)             | 42.6 (39.1, 46.1)              | 0.45           |

Values are mean (95% CI). Data was checked for normality and log-transformed if needed to perform the unpaired *t*-test. Italicized p-values were obtained from log-transformed data. HEI-healthy eating index

**Supplementary Table S5.** Analysis of  $\Delta$  SBP and  $\Delta$  DBP by BMI between cherry and placebo groups

| <b>Variable</b>           | <b>BMI level</b> | <b>Treatment</b>                      |                                     | <b>Difference (Cherry- Placebo)</b> |                |
|---------------------------|------------------|---------------------------------------|-------------------------------------|-------------------------------------|----------------|
|                           |                  | <b>Cherry</b>                         | <b>Placebo</b>                      | <b>Mean (95% CI)</b>                | <b>p value</b> |
| $\Delta$ SBP <sup>#</sup> | <b>High BMI</b>  | -7.57 (-13.03, -2.10)<br><i>n</i> = 7 | 3.45 (-4.35, 11.25)<br><i>n</i> = 6 | -11.02 (-19.16, -2.88)              | <b>0.008</b>   |
| $\Delta$ DBP <sup>*</sup> | <b>High BMI</b>  | -6.48 (-12.61, -0.35)<br><i>n</i> = 7 | 0.28 (-6.35, 6.92)<br><i>n</i> = 6  | -6.77 (-15.76, 2.21)                | 0.13           |

<sup>#</sup> Data are mean (95% CI). Difference between treatments was determined by unpaired *t*-test. <sup>\*</sup> Data are estimated marginal means (95% CI) obtained after adjustment for significant D1 values. Difference between treatments was assessed by Mann-Whitney test.

**Supplementary Table S6.** Analysis of  $\Delta$  IFN $\gamma$  by BMI and gender between cherry and placebo groups

| <b>Variable</b> | <b>Level</b> | <b>Treatment</b>                     |                                    | <b>Difference (Cherry- Placebo)</b> |                |
|-----------------|--------------|--------------------------------------|------------------------------------|-------------------------------------|----------------|
|                 |              | <b>Cherry</b>                        | <b>Placebo</b>                     | <b>Mean <math>\pm</math> SE</b>     | <b>p value</b> |
| <b>BMI</b>      | <b>High</b>  | -0.78 (-1.46, -0.10)<br><i>n</i> = 7 | 3.92 (-0.37, 8.22)<br><i>n</i> = 4 | -4.71 (-7.07, -2.34)                | <b>0.006</b>   |
| <b>Gender</b>   | <b>Male</b>  | -0.41 (-1.22, 0.40)<br><i>n</i> = 7  | 2.28 (0.59, 3.97)<br><i>n</i> = 6  | -2.69 (-4.24, -1.14)                | <b>0.01</b>    |

Data are mean (95% CI). Difference between treatments was determined by Mann-Whitney test.

**Supplementary Table S7.** Differential WBC count in cherry and placebo groups.

| Variable                                          | Day | Treatment                             |                                       | 2-way ANOVA <i>p</i> values |      |             |
|---------------------------------------------------|-----|---------------------------------------|---------------------------------------|-----------------------------|------|-------------|
|                                                   |     | Cherry ( <i>n</i> = 19)               | Placebo ( <i>n</i> = 21)              | Treatment                   | Day  | Interaction |
| WBC<br>x10 <sup>3</sup> /uL                       | D1  | 6.78 (5.69, 7.87)<br><i>n</i> = 14    | 6.49 (5.50, 7.48)<br><i>n</i> = 16    | 0.38                        | 0.94 | 0.62        |
|                                                   | D30 | 5.93 (3.81, 8.03)<br><i>n</i> = 14    | 6.34 (5.64, 7.03)<br><i>n</i> = 16    |                             |      |             |
| Neutrophils<br>(%)                                | D1  | 52.35 (47.39, 57.31)<br><i>n</i> = 14 | 53.87 (49.82, 57.92)<br><i>n</i> = 16 | 0.48                        | 0.95 | 0.77        |
|                                                   | D30 | 51.92 (44.05, 59.35)<br><i>n</i> = 14 | 54.50 (50.66, 58.33)<br><i>n</i> = 16 |                             |      |             |
| Lymphs (%)                                        | D1  | 36.71 (32.33, 41.09)<br><i>n</i> = 14 | 35 (31.56, 38.93)<br><i>n</i> = 16    | 0.38                        | 0.48 | 0.58        |
|                                                   | D30 | 37.21 (30.01, 44.41)<br><i>n</i> = 14 | 33.37 (29.37, 37.37)<br><i>n</i> = 16 |                             |      |             |
| Monocytes<br>(%)                                  | D1  | 7.85 (6.84, 8.86)<br><i>n</i> = 14    | 7.62 (6.27, 8.97)<br><i>n</i> = 16    | 0.95                        | 0.84 | 0.75        |
|                                                   | D30 | 7.78 (6.93, 8.63)<br><i>n</i> = 14    | 7.95 (6.31, 9.59)<br><i>n</i> = 16    |                             |      |             |
| Eos (%)                                           | D1  | 2.00 (1.40, 2.59)<br><i>n</i> = 14    | 2.06 (1.46, 2.66)<br><i>n</i> = 16    | 0.80                        | 0.79 | 0.60        |
|                                                   | D30 | 2.28 (1.59, 2.98)<br><i>n</i> = 14    | 2.25 (1.54, 2.96)<br><i>n</i> = 16    |                             |      |             |
| Neutrophils<br>(Absolute)<br>x10 <sup>3</sup> /uL | D1  | 3.66 (2.79, 4.53)<br><i>n</i> = 14    | 3.53 (2.92, 4.13)<br><i>n</i> = 16    | 0.62                        | 0.81 | 0.75        |
|                                                   | D30 | 3.78 (2.90, 4.66)<br><i>n</i> = 14    | 3.51 (2.99, 4.02)<br><i>n</i> = 16    |                             |      |             |
| Lymphs<br>(Absolute)<br>x10 <sup>3</sup> /uL      | D1  | 2.40 (2.10, 2.69)<br><i>n</i> = 14    | 2.39 (1.93, 2.85)<br><i>n</i> = 16    | 0.15                        | 0.46 | 0.26        |
|                                                   | D30 | 2.46 (2.16, 2.76)<br><i>n</i> = 14    | 2.08 (1.82, 2.34)<br><i>n</i> = 16    |                             |      |             |
| Monocytes<br>(Absolute)<br>x10 <sup>3</sup> /uL   | D1  | 0.52 (0.43, 0.61)<br><i>n</i> = 14    | 0.48 (0.40, 0.56)<br><i>n</i> = 16    | 0.52                        | 0.48 | 0.75        |
|                                                   | D30 | 0.53 (0.43, 0.63)<br><i>n</i> = 14    | 0.51 (0.44, 0.59)<br><i>n</i> = 16    |                             |      |             |
| Eos<br>(Absolute)<br>x10 <sup>3</sup> /uL         | D1  | 0.13 (0.08, 0.18)<br><i>n</i> = 14    | 0.13 (0.11, 0.16)<br><i>n</i> = 16    | 0.62                        | 0.16 | 0.53        |
|                                                   | D30 | 0.17 (0.11, 0.23)<br><i>n</i> = 14    | 0.15 (0.11, 0.19)<br><i>n</i> = 16    |                             |      |             |

Data are mean (95% CI). Data was analyzed by fitting a 2-way ANOVA analysis, followed by Šídák multiple comparison test. Italicized *p* values were obtained from log-transformed data. WBC: white blood count.

**Supplementary Table S8.** Correlation matrix between variables showing significant changes in cherry and placebo groups

| Variables       | Cherry              |                    |                   |                       |                  |
|-----------------|---------------------|--------------------|-------------------|-----------------------|------------------|
|                 | $\Delta$ BW         | $\Delta$ BMI       | $\Delta$ IL-10    | $\Delta$ IFN $\gamma$ | $\Delta$ TG      |
| $\Delta$ BW     | -                   | r= 0.66<br>p=0.002 | r=0.48<br>p=0.05  | -                     | -                |
| $\Delta$ SBP    | r=0.67<br>p=0.002   | r=0.45<br>p=0.05   | -                 | r=0.48<br>p=0.04      | -                |
| Variables       | Placebo             |                    |                   |                       |                  |
|                 | $\Delta$ BW         | $\Delta$ BMI       | $\Delta$ SBP      | $\Delta$ IFN $\gamma$ | $\Delta$ TG      |
| $\Delta$ BMI    | r=0.91<br>p=<0.0001 | -                  | -                 | -                     | -                |
| $\Delta$ DBP    | -                   | -                  | r=0.64<br>p=0.002 | -                     | r=0.41<br>p=0.05 |
| $\Delta$ IL-1RA | r=-0.43<br>p=0.05   | r=-0.51<br>p=0.02  | r=0.45<br>p=0.04  | -                     | -                |
| $\Delta$ IL-10  | -                   | -                  | -                 | r=0.81<br>p=0.0001    | -                |

Spearman's correlation coefficient (r) and p values were obtained using GraphPad Prism (v. 9.3.1)

## References

1. F. Abderrahim, E. Huanatico, R. Repo-Carrasco-Valencia, S. M. Arribas, M. C. Gonzalez and L. Condezo-Hoyos, Effect of germination on total phenolic compounds, total antioxidant capacity, Maillard reaction products and oxidative stress markers in canihua (*Chenopodium pallidicaule*), *Journal of Cereal Science*, 2012, **56**, 410-417.
2. N. N. Lage, M. A. A. Layosa, S. Arbizu, B. P. Chew, M. L. Pedrosa, S. Mertens-Talcott, S. Talcott and G. D. Noratto, Dark sweet cherry (*Prunus avium*) phenolics enriched in anthocyanins exhibit enhanced activity against the most aggressive breast cancer subtypes without toxicity to normal breast cells, *Journal of Functional Foods*, 2020, **64**, 103710.
3. M. M. Giusti and R. E. Wrolstad, Characterization and Measurement of Anthocyanins by UV-Visible Spectroscopy, *Current Protocols in Food Analytical Chemistry*, 2001, **00**, F1.2.1-F1.2.13.
